# Supplementary material for: Modest dose anti-thymocyte globulin administered intraoperatively is safe and effective in kidney transplantations: a retrospective study
Source: PeerJ. 2019 Aug 16;7:e7274. doi: 10.7717/peerj.7274 (PMC6699478; doi:10.7717/peerj.7274)
Supplement: Supplemental Information 2 — Raw data was provided for analysis in this study. [file peerj-07-7274-s002.xls]

## Sheet: Sheet1
Patient number	modest dose ATG 0, low ATG 1, simulect 2	ATG total dosage (mg)	Dose interruption/premature termination	Reason for dose interruption	gender male 1 female0.742	total ATG/kg	BW	Height	BMI	age	PH: H/T	PH: DM	PH: CAD	PH: CVA	preop dialysis duration (yr)	post op dialysis	DGF (POD 7 HD)	retransplant (1 Yes; 0 No)	op time (min)	warm ischemia time	baseline Cr	postop Cr	POD 3 Cr	POD 7 Cr	1 mon Cr	3 mon Cr	6 mon Cr	1 yr Cr	infection	BK viruria	CMV	UTI	BPAR	Malignancy	PTDM	Hospitalization days	Graft survival 1 year (survive 1)	Patient survival 1 year (survive 1)	expired with graft	expired date	post OP 24hr urine(<1000: 0 >1000:1)	KDPI (%)	KDRI
10	2		0		1		82	170	28.4	42	1	0	0	0	2	0	0	0	291	45	9.24	12.76	1.8	1.17	1.15	1.13	1.14	1.08	0	0	0	0	0	0	0	12	1	1	0	0	1	1	0.57
11	2		0		0.742		54	164	20.1	44	0	0	0	0	4	0	0	0	279	50	7.33	3.59	3.48	2.17	0.74	0.81	0.81	0.81	1	0	0	1	0	1	0	20	1	1	0	0	1
12	1	125	1	thrombocytopenia	1	2.19298	57	158	22.8	61	1	0	0	0	12	0	0	0	270	56	7.55	7.67	2.34	1.06	1.07	0.95	0.91	1.02	0	0	0	0	0	1	1	11	1	1	0	0	0	23	0.77
13	2		0		0.742		50	154	21.1	52	1	0	0	0	8	0	0	0	261	55	4.74	4.39	1.07	0.76	0.89	0.89	0.81	0.89	1	0	0	1	0	0	0	11	1	1	0	0	1	23	0.77
14	2		0		0.742		53	163	19.9	41	0	0	0	0	15	0	0	0	267	67	7.18	7.74	6.02	1.77	1.54	1.27	1.27	1.35	0	0	0	0	0	0	0	16	1	1	0	0	0	16	0.73
15	2		0		1		61.8	165	22.7	61	1	0	0	0	3	1	1	0	324	45	6.19	7.05	5.89	2.7	1.26	1.3	1.11	1.19	1	0	0	1	0	0	0	18	1	1	0	0	0	16	0.73
17	2		0		1		73	168	25.8	60	1	0	0	0	7	0	0	0	412	54	9.23	5.57	2.68	1.93	1.14	0.88	0.78	0.79	1	0	0	1	0	0	0	20	1	1	0	0	1	2	0.58
18	1	250	0		1	3.90625	64	168	22.7	35	1	1	0	0	4	0	0	0	288		7.96	7.68	4.97	2.4	1.59	1.37	1.11	1.04	0	0	0	0	0	0	0	18	1	1	0	0	1	2	0.58
19	2		0		1		71	167	25.5	32	0	0	0	0	7	1	1	0	341	52	11.9	11.89	10.49	10.2	1.9	1.93	1.89	1.9	1	0	0	0	0	0	0	22	1	1	0	0	0	94	1.75
20	2		0		0.742		46	159	18.2	36	0	0	0	0	3	0	0	0	285	36	4.54	6	3.1	1.6	1.15	1.22	1.25	1.35	1	0	0	1	1	0	0	16	1	1	0	0	1	94	1.75
21	1	275	0		0.742	6.00437	45.8	1.49	20.6297	51	1	0	1	0	15	1	1	0	350	42	6.17	8.54	6.5	6.97	1.43	1.14	1.05	1.04	0	0	0	0	0	1	0	20	1	1	0	0	0
22	1	300	0		0.742	5.66038	53	1.524	22.8195	44	0	0	0	0	26	1	1	0	338	45	12.13	6.75	11.83	6.61	1.46	1.09	1.27	1.1	0	0	0	0	0	0	0	16	1	1	0	0	0
23	1	600	0		1	7.29927	82.2	1.73	27.465	58	0	0	0	1	19	1	1	0	449		13.57	8.83	7.6	7.31	0.91	0.79	0.75	0.77	1	0	0	1	0	0	0	20	1	1	0	0	0	32	0.84
24	1	250	0	start function	1	3.42466	73	1.63	27.4756	47	1	0	0	0	10	1	1	0	314		10.12	10.37	8.16	3.08	1.58	1.52	1.49	1.73	0	0	0	0	0	1	0	15	1	1	0	0	0	61	1.11
25	1	150	0	start function	0.742	3.84615	39	1.57	15.8221	30	0	0	0	0	8	1	0	0	223	34	12.56	12.79	10.24	1.78	1.04	0.81	1.21	1.05	1	0	0	1	0	0	0	21	1	1	0	0	0	28	0.82
26	1	150	1	fever	0.742	2.7027	55.5	1.526	23.8333	54	0	0	0	0	11	0	0	0	202	40	11.63	5.47	1.98	1.22	1	0.98	0.96	0.86	1	0	0	1	0	1	0	14	1	1	0	0	1	28	0.82
27	1	50	0		0.742	1.07527	46.5	1.51	20.3938	47	0	0	0	0	8	1	1	0	213	39	8.83	4.3	2.77	4.75	0.9	0.67	0.75	0.71	0	0	0	0	0	0	0	23	1	1	0	0	1
28	1	425	0		0.742	7.14286	59.5	1.58	23.8343	53	0	0	0	0	12	1	1	0	283	55	9.77	6.12	6.53	5.51	1.21	1.09	1.29	0.99	1	0	0	1	0	0	0	21	1	1	0	0	0
29	0	400	0		0.742	6.31912	63.3	1.66	22.9714	52	0	0	0	0	11	1	1	0	320		6.96	8.54	7.1	5.01	0.9	0.92	0.75	0.79	0	0	0	0	0	0	0	18	1	1	0	0	0	20	0.75
30	2	40	0		0.742	0.911162	43.9	1.45	20.8799	41	0	0	0	0	5	0	0	0	271	50	5.72	6.6	0.78	0.65	0.65	0.65	0.7	1	0	1	0	0	0	0	0	16	1	1	0	0	1
31	0	275	1	thrombocytopenia	0.742	7.08763	38.8	1.472	17.9067	58	0	0	0	0	15	1	1	0	291	50	7.51	7.28	6.66	4.92	1.81	2.23	2.55	3.91	1	0	1	1	0	0	0	17	1	1	0	0	0	50	0.99
32	0	325	0	start function	1	5.60345	58	1.7	20.0692	38	1	0	0	0	16	0	0	0	248	34	5.96	4.44	8.94	7.03	1.5	1.28	1.27	1.84	1	0	1	0	0	0	0	15	1	1	0	0	0	50	0.99
33	2	40	0		1	0.526316	76	1.75	24.8163	45	1	1	0	0	4	0	0	0	261	42	9.18	8.72	1.56	1.13	1.42	1.23	1.3	1.27	0	0	0	0	0	0	0	13	1	1	0	0	1	9	0.67
34	2	40	0		1	0.644122	62.1	1.544	26.0494	42	0	0	0	0	15	0	0	0	288	38	9.35	9.05	1.51	1.32	1.04	0.86	0.77	0.82	0	0	0	0	0	0	0	13	1	1	0	0	1	9	0.67
35	0	450	0		1	7.9929	56.3	1.65	20.6795	47	1	0	0	0	6	0	0	0	351	47	9.85	10.35	7.16	2.46	2.11	1.35	1.15	1.11	0	0	0	0	0	0	0	40	1	1	0	0	1	45	0.95
36	2	40	0		0.742	0.727273	55	1.69	19.257	35	1	0	0	0	9	0	0	0	281	54	12.21	12.86	7.27	4.13	1.35	1.01	1.58	5.53	1	1	0	0	0	0	0	15	1	1	0	0	1	43	0.93
37	0	175	1	fever	0.742	3.53535	49.5	1.6	19.3359	49	1	0	0	0	10	1	1	0	322	57	13	6.4	5.11	3.97	1.7	1.42	1.42	1.09	1	0	0	1	0	0	0	23	1	1	0	0	0	49	0.99
38	1	225	0	start function	0.742	4.44664	50.6	1.57	20.5282	45	1	0	0	0	3	0	0	0	324	58	11.11	6.19	5.03	3.37	1.59	1.32	1.39	1.14	0	0	0	0	0	0	0	17	1	1	0	0	1	49	0.99
39	2	40	0		1	0.515464	77.6	1.8	23.9506	32	0	0	0	0	8	0	0	0	317		7.02	8.83	3.67	2.14	1.67	1.65	1.38	1.38	0	0	0	0	0	0	0	16	1	1	0	0	1	33	0.84
40	1	350	0		0.742	7	50	1.58	20.0288	53	0	0	0	0	7	0	0	0	268	54	4.24	5.17	5.87	2.81	1.2	1.33	1.26	0.97	1	0	0	1	0	0	0	16	1	1	0	0	1	33	0.84
41	2	40	0		1	0.506329	79	1.8	24.3827	31	1	0	0	0	5	1	1	0	369	42	11.95	8.38	10.87	6.69	2.12	1.93	1.57	1.76	1	1	0	0	0	0	0	19	1	1	0	0	0
42	1	275	0		0.742	6.20767	44.3	1.49	19.9541	55	1	0	0	0	13	1	1	0	388	38	11.25	7.16	5.79	13.74	1.64	1.91	1.37	1.11	1	0	0	0	0	0	0	18	1	1	0	0	0	19	0.75
43	1	225	1	thrombocytopenia	1	2.52809	89	1.67	31.9122	39	1	0	0	0	4	1	1	0	408	34	9.89	11.42	14.99	10.81	3.35	1.73	1.65	1.96	1	0	0	0	0	0	0	35	1	1	0	0	0	52	1.02
44	1	200	1	fever	0.742	3.55872	56.2	1.5	24.9778	63	0	0	0	0		1	1	0	320	30	4.35	5.81	5.08	5.37	1	0.86	0.82	1.23	0	0	0	0	0	0	1	23	1	1	0	0	0	52	1.02
45	2	40	0		1	0.561798	71.2	1.77	22.7265	60	1	0	0	0	9	0	0	0	319	49	13.23	8.47	5.49	1.98	1.57	1.45	1.35	1.27	0	0	0	0	0	1	0	14	1	1	0	0	1	64	1.14
46	2	40	0		1	0.533333	75	1.76	24.2123	52	1	1	1	0	2	0	0	0	358	53	8.9	6.61	2.52	2.07	1.73	2.01	2.58	1.81	1	0	0	1	0	0	0	42	1	1	0	0	1	64	1.14
47	2	40	0		0.742	0.793651	50.4	1.54	21.2515	36	0	0	0	0	7	0	0	0	218		11.44	4.9	0.65	0.75	1.04	0.95	0.83	1	1	1	0	0	0	0	0	12	1	1	0	0	1	35	0.87
48	2	40	0		1	0.490798	81.5	1.78	25.7228	35	0	0	0	0	10	0	0	0	321		12.28	9.99	7.09	4.05	1.75	1.79	1.45	1.45	0	0	0	0	0	0	0	17	1	1	0	0	1	35	0.87
49	1	150	1	fever	0.742	3.26087	46	1.6	17.9688	37	1	0	0	0	2	0	0	0	356	42	13.04	12.29	6.19	1.62	1.43	1.29	1.61	1.76	1	1	0	1	0	0	0	23	1	1	0	0	1	84	1.44
50	1	250	0		1	3.67647	68	1.75	22.2041	50	1	0	0	0	12	1	0	0	442	65	10.88	7.69	7.12	3.19	1.32	2.14	2.16	2.65	1	1	0	0	0	0	0	22	1	1	0	0	1	84	1.44
51	1	300	0	day 5 and thrombocyto[enia	1	3.61446	83	1.76	26.8	30	1	0	0	0	3	1	1	0	299	40	22.42	21.21	20.82	6.79	1.51	2	1.6	1.82	1	0	1	0	0	0	0	18	1	1	0	0	0	68	1.19
52	2		0		1		104	1.73	34.7	38	1	1	0	0	2	1	1	0	231		14.09	14.36	16.99	3.46	1.44	1.33	1.54	1.31	0	0	0	0	0	0	0	13	1	1	0	0	1	68	1.19
53	2		0		0.742		63.9	168.7	22.5	36.4	1	0	0	0	13	1	0	0	295		4.64	4.24	1.44	1.1	1.44	1.18	1.07	1.03	1	0	0	1	1	0	0	9	1	1	0	0	1
54	2		0		0.742					46	1	0	0	0	6	0	0	0	275	55	4.66	4.86	0.94	0.7	0.8	0.97	1.03	1.57	1	1	0	0	1	0	1	12	1	1	0	0	1	10	0.68
55	2		0		0.742		55	154	23.2	54.4	1	0	0	0	10	0	0	0	299	39	10.83	6.28	0.96	0.98	0.97	0.96	0.94	0.8	1	1	0	0	0	0	0	12	1	1	0	0	1	10	0.68
56	2		0		0.742		55	164.5	20.3	43.5	0	0	0	0	14	0	0	0	275	45	8.08	8.03	2.4	1.06	1.25	1.07	0.99	1.08	1	0	0	1	0	0	0	13	1	1	0	0	0	34	0.85
57	1	100	1	thrombocytopenia	1	1.36986	73	1.68	25.9	57	1	0	0	0	11	1	1	0	412	48	7.16	9.64	9.15	2.8	4.8	9.92	9.65	12.24	1	0	0	0	1	0	0	78	0	1	0	0	0	34	0.85
58	1	300	0		1	4.41176	68	1.66	24.7	68	0	0	0	0	14	1	1	0	326	43	7.52	7	7.43	5.92	1.6	1.23	1.53	1.49	1	0	0	0	0	0	0	14	1	1	0	0	0	40	0.9
59	1	200	0		1	2.94118	68	1.66	24.7	57	0	0	0	0	11	1	1	0	362	49	5.51	5.73	9.65	6.31	1.18	1.05	0.93	1.1	0	0	0	0	0	0	0	14	1	1	0	0	0	40	0.9
60	2		0		1		115	177	36.7	38	1	0	0	0	1.5	0	0	0	249		15.38	8.66	2.16	1.3	1.21	0.93	0.85	0.87	0	0	0	0	0	0	0	13	1	1	0	0	1	10	0.68
61	2		0		0.742					32.1	1	0	0	0	13	1	1	0	238	60	6.71	6.92	7.35	8.05	4.93	2.25	2.29		1	0	1	0	0	0	0	97	0	1	0	0	0	37	0.88
62	2		0		1		68.8	169	24	47.8	0	0	0	0	15	1	0	0	303	42	12.52	8.95	16.72	10.08	1.3	1.19	1.77	1.23	0	1	0	0	1	1	0	16	1	1	0	0	0	71	1.23
63	2		0		0.742					27.8	1	0	0	0	12	1	1	0	247	60	7.55	4.79	5.82	6.47	1.02	1.06	0.6	0.64	1	0	0	1	0	0	0	25	1	1	0	0	0	71	1.23
64	2		0		0.742					53.1	1	0	0	0	11	0	0	0	259	38	7.36	5.52	4.18	2.38	1.65	1.21	1.31	1.17	0	0	0	0	0	0	0	12	1	1	0	0	0	85	1.45
65	1	275	0	start function	1	4.26357	64.5	158	25.8	54.9	0	0	0	0	13	1	1	0	309	63	15.36	8.36	8.92	14.1	2.1	1.78	1.68	1.86	0	0	0	0	0	0	0	16	1	1	0	0	0	85	1.45
66	2		0		1					44.5	0	0	0	0	6	0	0	0	311	47	9.58	9.12	8.61	2.55	2.07	2.05	2.16	2.12	0	0	0	0	0	0	0	11	1	1	0	0	0	50	1
67	2		0		0.742		61	163	22.9	56.1	0	0	0	0	14	0	0	0	261	38	12.56	5.27	9.05	7.76	1.7	1.75	1.76	1.38	1	0	0	1	0	0	0	13	1	1	0	0	0	50	1
68	2		0		0.742		66	167	23.7	47.2	0	0	0	0	4	0	0	0	275	40	9.87	9.1	5.42	2.28	1.45	2.11	1.49	1.52	1	0	0	1	0	0	0	8	1	1	0	0	0	44	0.94
69	2		0		1		61	168	21.6	30.6	1	0	0	0	6	0	0	0	252	35	11.3	11.03	1.55	1.43	1.63	1.46	1.44	1.24	1	0	0	1	0	0	0	11	1	1	0	0	1	44	0.94
70	0	175	0	no day 4	0.742	2.84091	61.6	157	25	59.4	1	0	0	0	19	0	0	0	272	37	4.36	5.62	8.88	4.69	1.62	1.59	1.32	1.34	1	0	0	1	0	0	0	14	1	1	0	0	0	86	1.47
71	0	75	0	day 0+day 4	0.742	3.94737	19	109	16	10.2	0	0	0	0	10	0	0	0	469	43	2.82	3.73	1.67	1.03	1.02	1.14	1.17		1	0	0	1	0	0	0	29	1	1	0	0	1	72	1.24
72	2		0		0.742		78	160	30.5	32	0	0	0	0	1	0	0	0	289	33	9.22	9.52	3.86	1.99	1.89	1.99	1.76		0	0	0	0	0	0	0	10	1	1	0	0	1	79	1.36
73	0	150	0		0.742	2.54237	59	151	25.9	59.6	1	0	0	0	4	0	0	0	318	50	7.91	8.92	5.72	1.96	2.17	1.85	1.76		1	1	0	1	0	0	0	12	1	1	0	0	0	79	1.36
74	2		0		0.742		52	153	22.2	31.4	0	0	0	0	9	0	0	0	366	46	8.64	9.5	8.27	4.2	2.26	1.63	1.87		1	0	0	1	0	0	0	9	1	1	0	0	0	84	1.44
75	2				0.742		59	1.52	25.5367	32	1	0	0	0	7	0	0	0	359		12.87	11.41	3.11	1.5	1.21	1.37	1.42	2.26	1	0	1	1	1	0	0	42	1	1	0	1	1	84	1.44
76	2				0.742		50.4	1.52	21.8144	41	1	0	0	0	4	1	1	0	318	46	8.97	9.78	13.49	10.14	2.22	2.05	1.48	1.48	0	0	0	0	0	0	0	13	1	1	0	0	0	55	1.04
77	0	375	0		1	4.49102	83.5	1.75	27.2653	41	1	0	0	0	7	1	1	0	313	49	12.61	15.06	13.72	15.03	4.86	2.53	1.88		0	0	0	0	0	0	0	15	1	0	1	1	1	55	1.04
78	0	250	0		0.742	4.62963	54	1.6	21.0938	61	1	0	0	0	4	0	0	0	280	41	9.02	9.56	11.92	7.41	1.55	1.32	1.08	1.07	0	0	0	0	0	0	1	9	1	1	0	0	0	54	1.03
79	0	300	0		1	4.41176	68	1.77	21.7051	50	1	0	0	0	6	1	1	0	317	42	15.72	11.47	11.53	12.94	1.61	1.84	1.74	1.63	1	1	0	1	0	0	0	13	1	1	0	0	0	54	1.03
80	0	250	0		1	4.31034	58	1.6	22.6562	40	1	0	0	0	3	0	0	0	315		12.37	11.69	1.77	1.05	1.19	1.23	1.33	1.1	0	0	0	0	0	0	0	8	1	1	0	0	1	36	0.88
81	2				1		60	1.72	20.2812	18	1	0	0	0	1	0	0	0	304	43	16.47	15.12	3.06	1.67	1.75	1.88	2.08	2.2	0	0	0	0	0	0	0	7	1	1	0	0	1	36	0.88
82	2				1		71.8	1.689	25.169	42	1	1	0	0	2	0	0	0	314		15.34	14.5	0.97	1.01	1.02	1.16	1.24	0.96	0			0		0	0	13	1	1	0	0	1
83	2				0.742		48.5	1.6	18.9453	41	0	0	0	0	2	0	0	0	340	41	7.97	4.29	1.15	1.05	0.85	0.93	0.76	0.94	1	1	0	0	1	0	0	16	1	1	0	0	1	47	0.97
84	2				0.742		70.1	1.569	28.4756	25	1	0	0	0	4	0	0	0	253		14.31	11.48	1.32	1.06	0.96	1.01	1.1	0.99	1		0	1		0	0	18	1	1	0	0	1	47	0.97
85	2				1		60.5	1.68	21.4357	46	1	0	0	0	8	0	0	0	300	53	9.96	10.17	4.68	2.46	1.98	1.68	1.9	1.85	0			0	0	0	0	8	1	1	0	0	1	37	0.88
86	2				0.742		53.5	1.54	22.5586	54	1	0	0	0	27	1	1	0	256	27	4.97	5.46	5.63	6.51	3.33	2.16	1.26	1.04	1	0	0	1	1	0	1	88	1	1	0	0	0	37	0.88
87	0	225	0		0.742	4.54545	49.5	1.55	20.6035	56	0	0	0	0	8	1	1	0	277		12.34	12.24	14.16	13.53	1.84	1.11	1.92	2.9	1	0	0	1	1	0	0	28	1	1	0	0	0	86	1.48
88	0	150	1	thromobocytopenia	0.742	2.66904	56.2	1.6	21.9531	59	1	0	0	0	5	1	1	0	354	66	12.23	12.12	13.16	5.32	0.95	0.85	0.9	0.85	0		0	0	0	0	1	16	1	1	0	0	0	94	1.76
89	2				0.742		43	1.59	17.0088	67	1	0	0	0	11	0	0	0	225	25	9.98	5.05	5.31	1.54	1.69	1.59	1.49	0.88	1	0	0	1	0	0	0	14	1	1	0	0	1	94	1.76
90	1	125			0.742	2.40385	52	1.6	20.3125	49	1	0	0	0	12	0	0	0	292	30	8.99	8.26	7.29	2.61	1.38	1.76	1.69	1.66	0			0	0	0	0	21	1	1	0	0	0	100	2.75
91	0	450	0		0.742	6.17284	72.9	1.5	32.4	46	0	0	0	0	8	0	0	0	420	65	11.23	11.37	11.77	8.64	2.38	2.4	2.08		0	0	0	0	0	0	0	10	1	1	0	0	0	95	1.8
92	2				1		69.2	1.666	24.9319	46	1	0	0	0	5	0	0	0	248		12.4	11	1.91	1.19	1.3	1.71	1.68		0			0	0	0	0	31	1	1	0	0	1	95	1.8
93	0	250	0		0.742	4.2735	58.5	1.62	22.2908	64	1	0	0	0	10	1	1	0	388	89	7.22	7.64	5.79	6.6	2.2	1.29	1.25		1	0	0	0	0	0	0	35	1	1	0	0	0
94	0	100	0		0.742	4.29185	23.3	1.1	19.2562	10	0	0	0	0	2	0	0	0	296	48	9.31	6.82	0.41	0.52	1.03	0.68	0.62		0	1	0	0	1	0	0	8	1	1	0	0	1	23	0.78
95	2				0.742		54	1.59	21.3599	55	1	0	0	0	4	0	0	0	313	58	4.65	3.33	1.71	0.8	0.89	0.85	0.85		0		0	0	0	0	0	11	1	1	0	0	1	23	0.78
96	0	350	0		1	3.68421	95	1.75	31.0204	33	1	0	0	0	4	1	1	0	381	43	19.34	18.3	18.68	16.01	7.22	3.08			1		0	1	0	0	0	66	1	0	1	1	0	87	1.5
97	0	125	0		0.742	2.97619	42	1.54	17.7096	18	1	0	0	0	2	0	0	0	268	39	9.82	9.39	9.9	8.59	3.1	2.29	5.28		1	0		0	1	0	0	12	1	1	0	0	1	87	1.5
98	2				1		65	1.63	24.4646	53	1	0	0	0	10	0	0	0	295	41	13.18	12.6	6.36	2.43	1.68	1.47			0	0	0	0	0	0	0	8	1	1	0	0	1
99	0	225	0		1	4.24528	53	1.53	22.6409	15	1	0	0	0	1	0	0	0	279	45	15.62	13.01	1.09	0.99	1.28				0	0	0	0	1	0	0	9	1	1	0	0	1	4	0.62
100	2				1		54	1.7	18.6851	18	1	0	0	0	1	0	0	0	334	35	14.7	12.75	1.34	1.25	1.32				0	0		0	0	0	0	15	1	1	0	0	1	4	0.62
101	0	275	0		1	4.85437	56.65	1.66	20.5581	54	1	1	0	0	5	0	0	0	510	50	6.56	7.55	6.72	3.26	3.04				0	0	0	0	1	0	0	10	1	1	0	0	0	60	1.1
